# Supplementary material for: Tin(iv) catalyzed d-galacturonic acid anomerization
Source: Royal Society of Chemistry journal article supplement (doi:10.1039/b710676a), 2007-11-23
Supplement: b710676a.pdf [file b710676a.pdf]

## Electronic Supporting Information.

### 1. Line-shape analysis by g-NMR best-fitting

Was achieved in order to confirm 2D-EXSY results albeit the large number of variables makes this method less accurate. Here we show a good best-fitting guess obtained by feeding the g-NMR with the EXSY results.

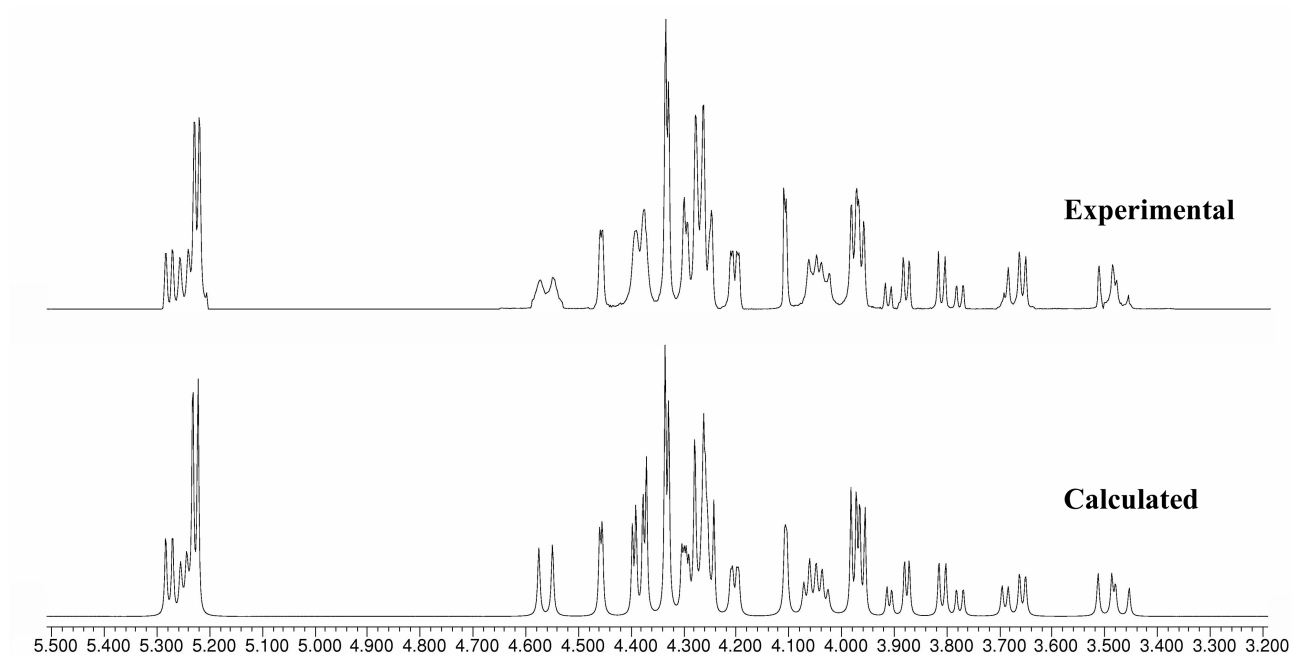

### 2. ESI-MS Spectra of **1** and **2** in $H_2O^{18}$

Were recorded in order to rule out the dominating effect of an external water nucleophilic attack in **2** (the enhancement, respect to **1**, does not justify the  $10^4$  overall rate increase).

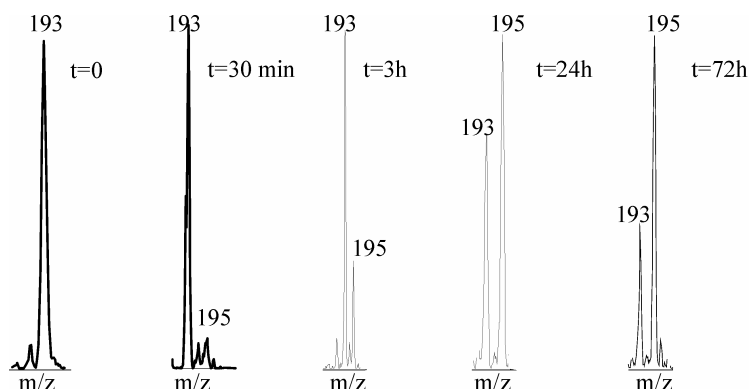

Fig.1 ESI-MS spectra of **1** in  $H_2O^{18}$

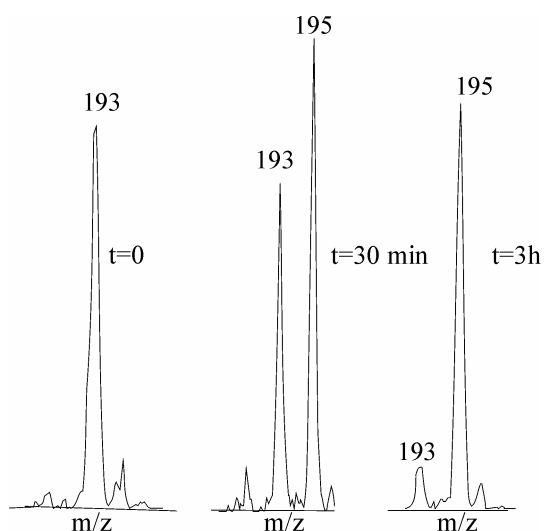

Fig.2 ESI-MS spectra of **2** in  $\text{H}_2^{18}\text{O}$

Tables listing mutarotation rate constants vs. temperatures used for thermodynamic calculations;  
table of the  $k_{(\alpha\text{p}-\beta\text{p})}$  vs.  $\text{pD}$  referred to **1**.

**Table S1.** Mutarotation rate constants at variable temperature for the activation parameter calculation.

|                                                                            | $k_{(\alpha\text{p}-\beta\text{p})}(\text{s}^{-1})$ | $k_{(\alpha\text{f}-\beta\text{f})}(\text{s}^{-1})$ |
|----------------------------------------------------------------------------|-----------------------------------------------------|-----------------------------------------------------|
| GalAH <sub>2</sub>                                                         | $3.9 \cdot 10^{-5}$ (285K)                          | -                                                   |
| <b>(1)</b>                                                                 | $18 \cdot 10^{-5}$ (298K)                           | -                                                   |
| $\text{pD} = 4.5$                                                          | $70 \cdot 10^{-5}$ (315K)                           | -                                                   |
|                                                                            | $300 \cdot 10^{-5}$ (330K)                          | -                                                   |
| [Sn(CH <sub>3</sub> ) <sub>2</sub> (GalA)(H <sub>2</sub> O) <sub>2</sub> ] | 1.4 (298K)                                          | 2.64 (298K)                                         |
| <b>(2)</b>                                                                 | 3.6 (311K)                                          | 10.3 (311K)                                         |
| $\text{pD} = 4.5$                                                          | 207.5 (368K)                                        | 135 (345K)                                          |

**Table S2.** Mutarotation rate constant  $k_{(\alpha\text{p}-\beta\text{p})}$  for **1** vs.  $\text{pD}$ .

| $\text{pD}^*$                                                   | 6.5 | 6.1 | 5.2 | 4.5 | 4.0 | 3.7 | 3.3 | 2.3 | 2.0 |
|-----------------------------------------------------------------|-----|-----|-----|-----|-----|-----|-----|-----|-----|
| $k_{(\alpha\text{p}-\beta\text{p})} \cdot 10^4 (\text{s}^{-1})$ | 6.0 | 3.8 | 1.9 | 1.7 | 1.7 | 1.8 | 1.8 | 2   | 2.3 |
